# Supplementary material for: RNA sequence analysis of rat acute experimental pancreatitis with and without fatty liver: a gene expression profiling comparative study
Source: PubMed Central journal article supplement (PMC5429720; doi:10.1038/s41598-017-00821-5), 2017-04-07
Supplement: 41598_2017_821_MOESM1_ESM.pdf [file 41598_2017_821_MOESM1_ESM.pdf]

**RNA sequence analysis of rat acute experimental pancreatitis with and without fatty liver: a gene expression profiling comparative study.**

Qian Wang<sup>1†</sup>, MD, Hongkai Yan<sup>2†</sup>, MD, Gang Wang<sup>1†</sup>, MD, Zhaoyan Qiu<sup>3†</sup>, MD, Bin Bai<sup>4</sup>, MD, Shiqi Wang<sup>4</sup>, MD, Pengfei Yu<sup>4</sup>, MD, Quanxin Feng<sup>4</sup>, MD, Qingchuan Zhao<sup>4\*</sup>, MD, PHD, Xianli He<sup>1\*</sup>, MD, PHD, Chaoxu Liu<sup>2,4\*</sup>, MD.

<sup>1</sup>Department of General Surgery, Tangdu Hospital, Fourth Military Medical University, Xi'an 710038, China.

<sup>2</sup>Department of General Surgery, Huashan Hospital, Fudan University, Shanghai, 201907, China.

<sup>3</sup>Department of General Surgery, The General Hospital of the People's Liberation Army, Beijing, 100039, China.

<sup>4</sup>Department of Surgery, Xijing Hospital of Digestive Diseases, Fourth Military Medical University, Xian, 710032, China.

†These authors contributed equally to this study.

**Running title:** gene expression profiling of rat acute pancreatitis with fatty liver

**\*Corresponding Author:**

Xianli He<sup>1</sup>

Qingchuan Zhao<sup>2</sup>

Chaoxu Liu<sup>2,3</sup>

<sup>1</sup>Department of General Surgery, Tangdu Hospital, Fourth Military Medical University, Xi'an 710038, China.

<sup>2</sup>Department of Surgery, Xijing Hospital of Digestive Diseases, Fourth Military Medical University, Xian, 710032, China.

<sup>3</sup>Department of General Surgery, Huashan Hospital North, Fudan University, No. 108 Luxiang Road, Shanghai, 201907, China

Tel: +86-21-66895079

Fax: +86-21-64085875

E-mail: <sup>1</sup>[xianlihe@126.com](mailto:xianlihe@126.com), <sup>2</sup>[zhaoqc@fmmu.edu.cn](mailto:zhaoqc@fmmu.edu.cn), <sup>3</sup>[chaoxuliu@yahoo.com](mailto:chaoxuliu@yahoo.com)

## Supplementary Figure S1

**RNA sequencing quality assessment.** Sequence reads quality assessment (a); Sequencing saturation analysis (b); Distribution of reads on reference genes of sample (c); Statistics of gene coverage (d); Correlations of expression values between replicates (e).

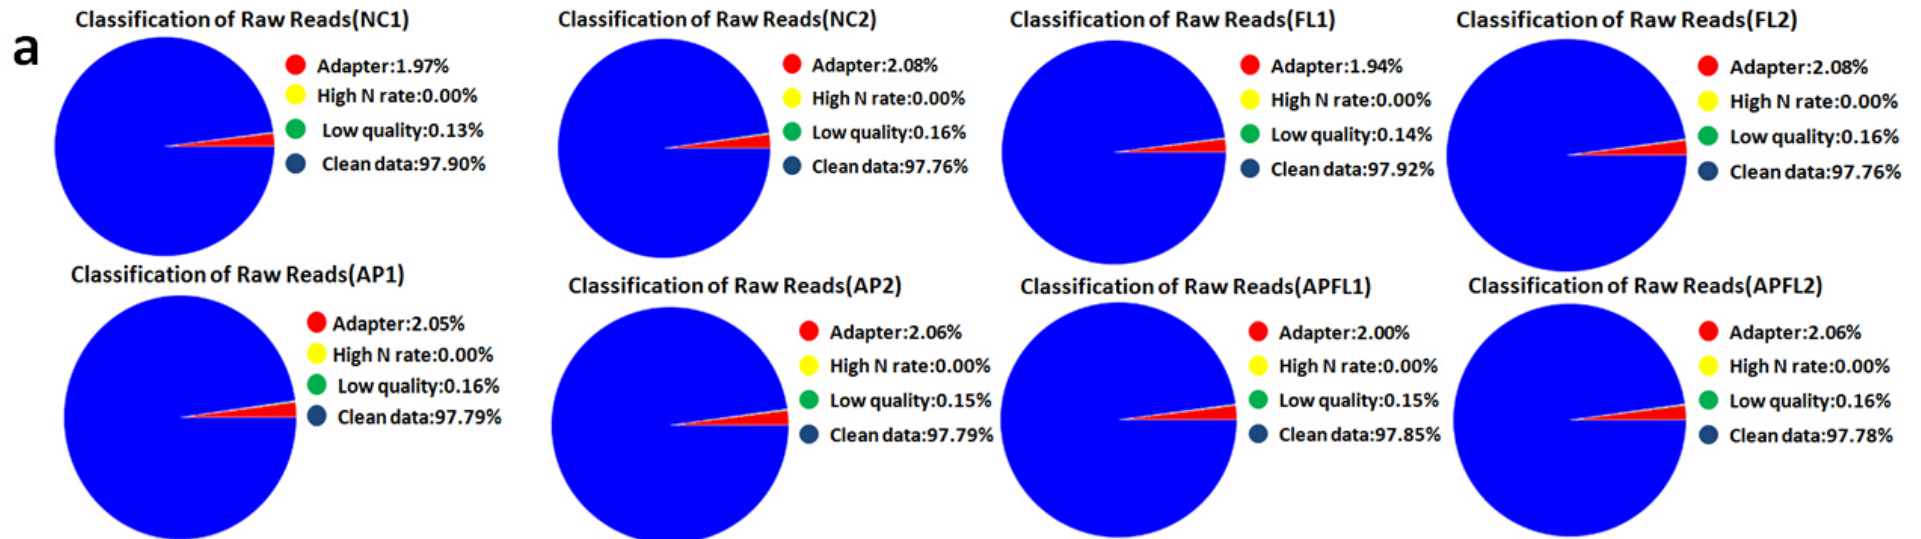

**b**

**NC1**

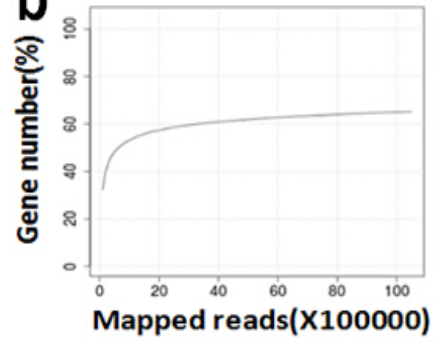

**NC2**

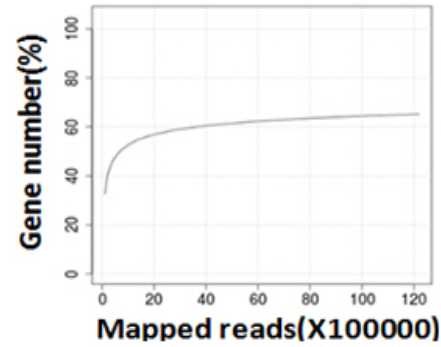

**FL1**

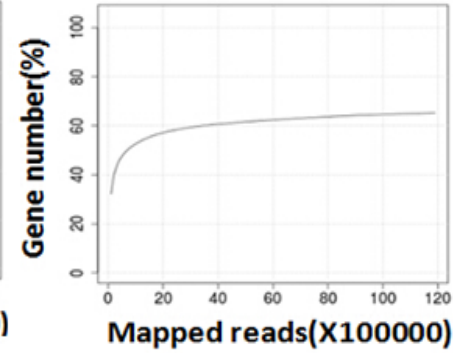

**FL2**

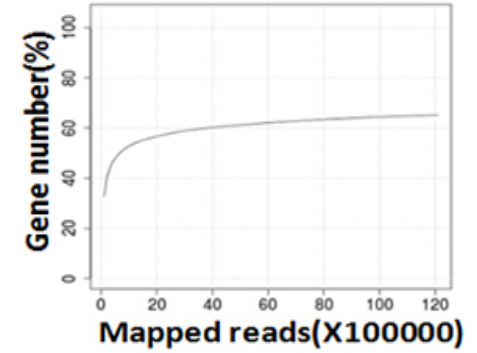

**AP1**

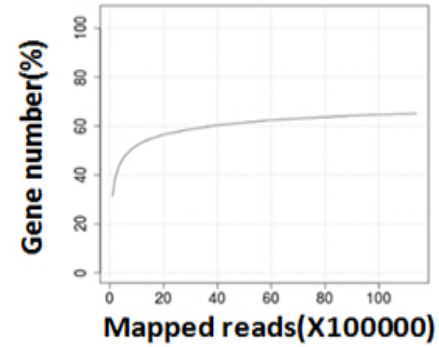

**AP2**

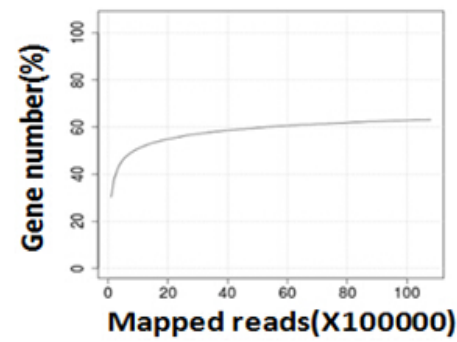

**APFL1**

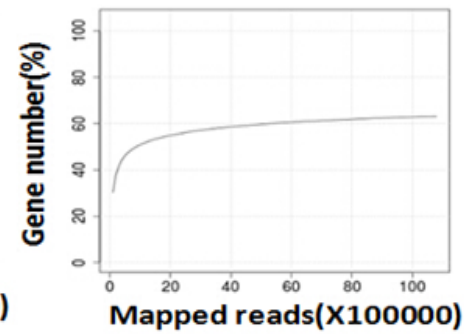

**APFL2**

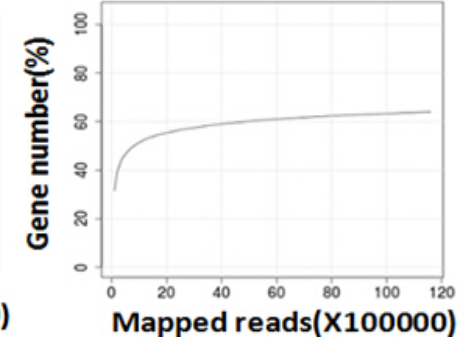

**C**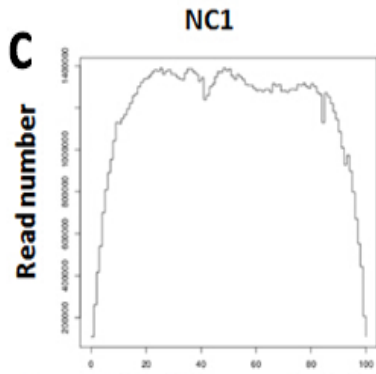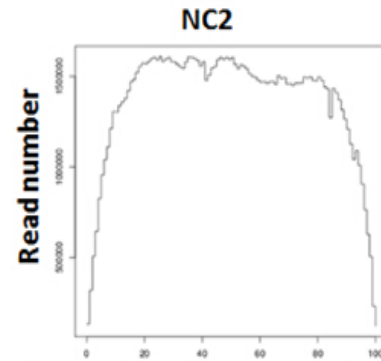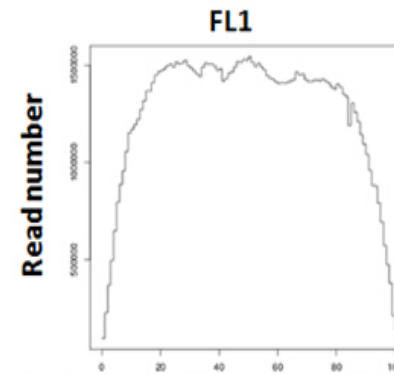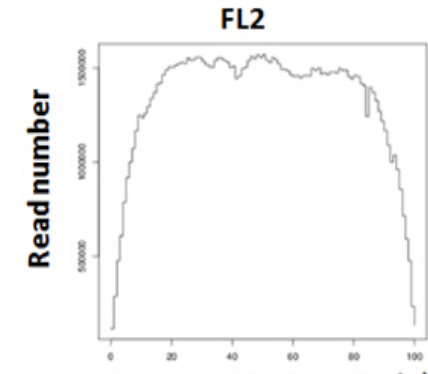

Percentile of the gene body(5' -&gt;3')

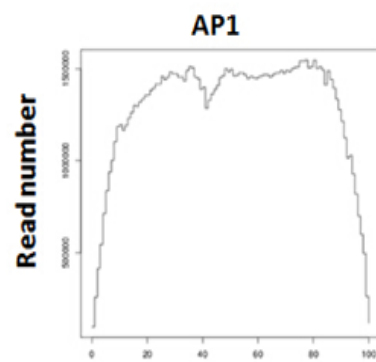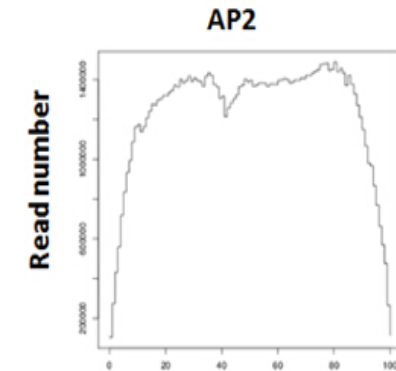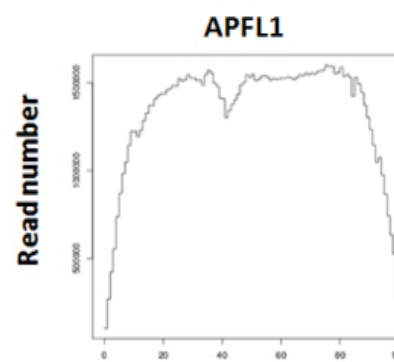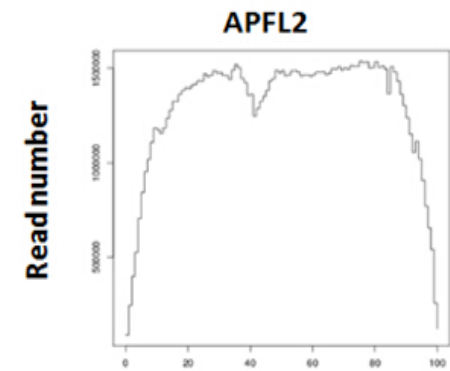

Percentile of the gene body(5' -&gt;3')

d

Distribution of Genes' Coverage(NC\_1)

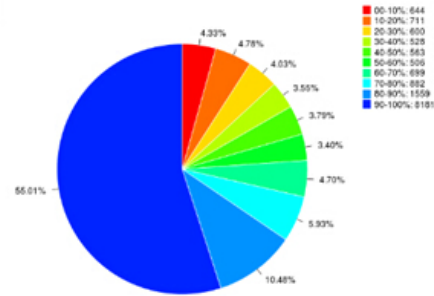

Distribution of Genes' Coverage(NC\_2)

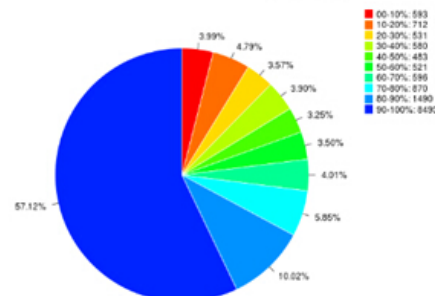

Distribution of Genes' Coverage(FL\_1)

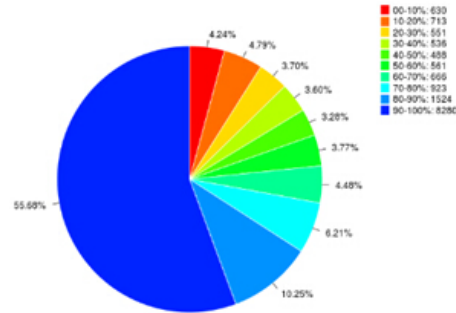

Distribution of Genes' Coverage(FL\_2)

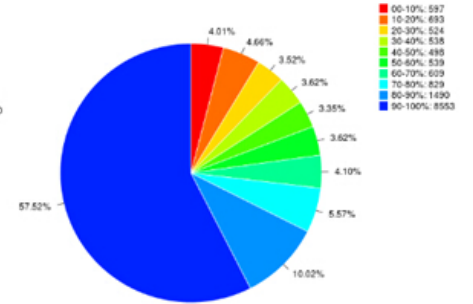

Distribution of Genes' Coverage(AP\_1)

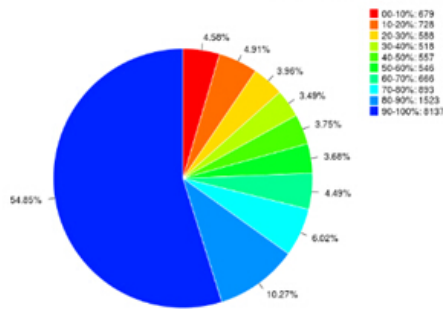

Distribution of Genes' Coverage(AP\_2)

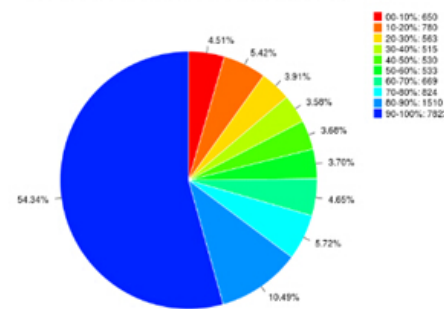

Distribution of Genes' Coverage(APFL\_1)

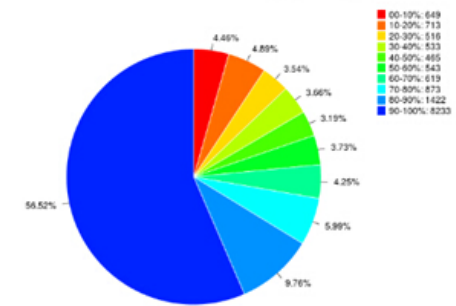

Distribution of Genes' Coverage(APFL\_2)

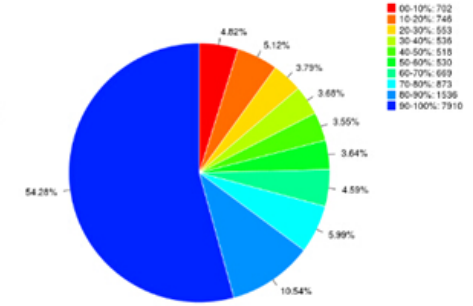

**e**

Sample NC1 and NC2 related analysis

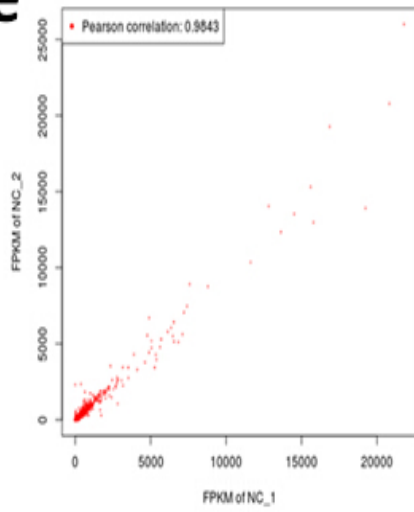

Sample FL1 and FL2 related analysis

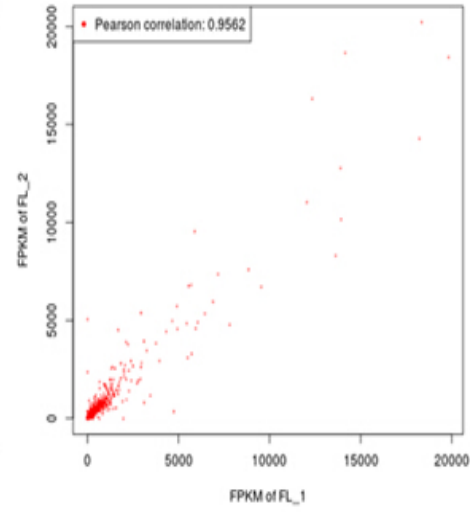

Sample AP1 and AP2 related analysis

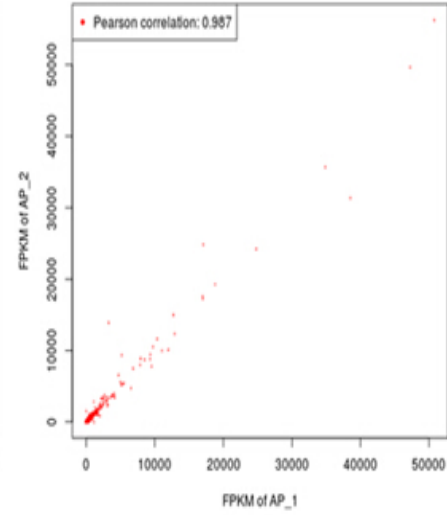

Sample APFL1 and APFL2 related analysis

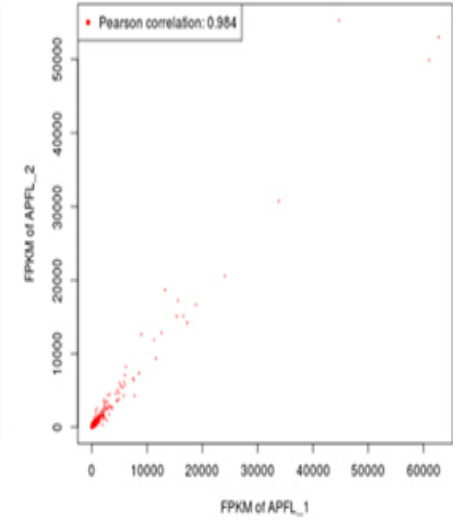

**Supplementary Table S1**

| <b>Supplementary Table S1 Primers for commonly dysregulated genes involved in PPAR and lipid metabolism from mRNA expression profiling results for quantitative RT-PCR validation.</b> |                                 |
|----------------------------------------------------------------------------------------------------------------------------------------------------------------------------------------|---------------------------------|
| <b>Gene</b>                                                                                                                                                                            | <b>Primer sequences(5'-3')</b>  |
| PPAR $\alpha$                                                                                                                                                                          | Forward GGCAATGCACTGAACATCGAG   |
|                                                                                                                                                                                        | Reverse GCCGAATAGTTCGCCGAAAG    |
| ACSL1                                                                                                                                                                                  | Forward TTCGCAGTGGCATCGTCAG     |
|                                                                                                                                                                                        | Reverse TGTGATCATCAGCCGGACTTTC  |
| CPT1A                                                                                                                                                                                  | Forward AGGTCGGAAGCCCATGTTGTA   |
|                                                                                                                                                                                        | Reverse GCTGTCATGCGCTGGAAGTC    |
| EHHADH                                                                                                                                                                                 | Forward CTCGCCAGAGCACATTGA      |
|                                                                                                                                                                                        | Reverse ACCCAACTGAGGCAGCATAGAAC |
| ACAA1A                                                                                                                                                                                 | Forward GCATCTCACGGCAGAAGCAA    |
|                                                                                                                                                                                        | Reverse TACGATCTCAGCACGGAAGCAG  |
| ACADM                                                                                                                                                                                  | Forward GCGTGACAGAACCCTCAGCA    |
|                                                                                                                                                                                        | Reverse TCCACGATGAATCCGGTGAA    |
| ACADSB                                                                                                                                                                                 | Forward AATGCCCTATGTTTCGCACCTC  |
|                                                                                                                                                                                        | Reverse TGCTTCAACTTCAATGCCCATC  |
| ALDH1B1                                                                                                                                                                                | Forward ACATGGGTCAGTGCTGCTGTG   |
|                                                                                                                                                                                        | Reverse ACCTGAGGTCCCTGTTGAGTGTC |
| HADH                                                                                                                                                                                   | Forward AGCACAGACCTGGTGGTGGA    |
|                                                                                                                                                                                        | Reverse AGACGTGTTGCTGGCAAAGATG  |
